# Supplementary material for: Translating restrictive law into practice: An ethnographic exploration of the systemic processing of legally restricted health care access for asylum seekers in Germany
Source: Springer Nature journal article supplement (doi:10.1186/s12939-024-02251-y), 2024-10-10
Supplement: 12939_2024_2251_MOESM4_ESM.pdf [file 12939_2024_2251_MOESM4_ESM.pdf]

**Additional file 4. Outcomes of requests for cost coverage**

For 54 patients 110\* requests for services were documented during the field time.

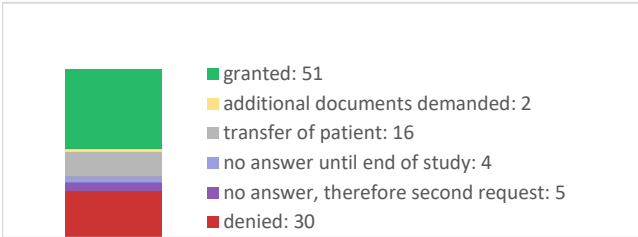

In the clinic of facility 1 (first reception) 38% of 39 decided requests were granted, in facility 2 (shared accommodation) 86% of 42.

\*(Missing values: 2, as apart from the application documentation, no further information was available)
